# Supplementary material
Source: PubMed Central journal article supplement (PMC4201967)
Supplement: NIHMS610398-supplement-suppl_figs.pdf [file NIHMS610398-supplement-suppl_figs.pdf]

# Plasma exosomal $\alpha$ -synuclein is likely CNS-derived and increased in Parkinson's disease

Min Shi, Changqin Liu, Travis J. Cook, Kristin M. Bullock, Yanchun Zhao, Carmen Gingham, Yanfei Li, Patrick Aro, Romel Dator, Chunmei He, Michael J. Hipp, Cyrus P. Zabetian, Elaine R. Peskind, Shu-Ching Hu, Joseph F. Quinn, Douglas R. Galasko, William A. Banks, and Jing Zhang

a. EGVVHGVATVAEK

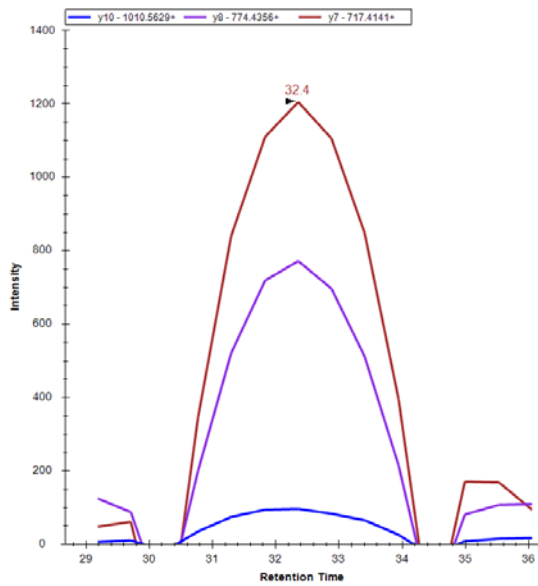

b. AKEGVVAAAEK

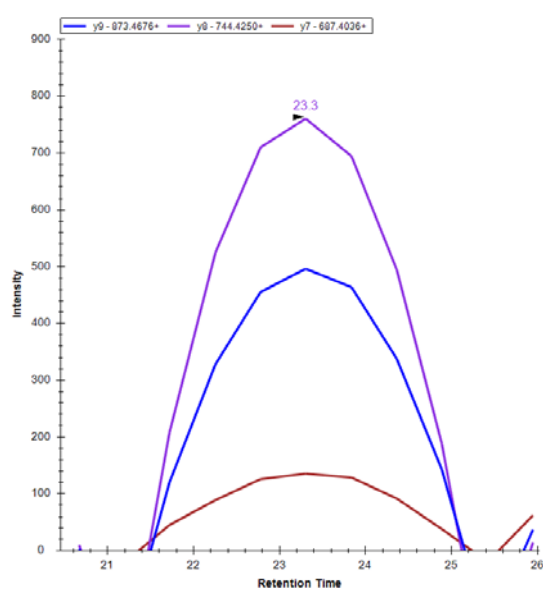

c. TVEGAGSIAAATGFVKK

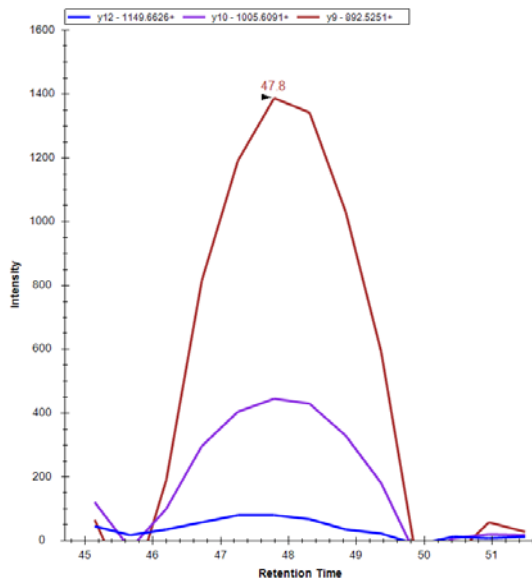

**Suppl. Fig. 1** Representative selected reaction monitoring (SRM) chromatograms of the  $\alpha$ -synuclein peptides detected in L1CAM-containing exosomes isolated from human plasma. SRM transitions are shown for (a) EGVVHGVATVAEK, (b) AKEGVVAAAEK (missed 1), and (c) TVEGAGSIAAATGFVKK (missed 1).

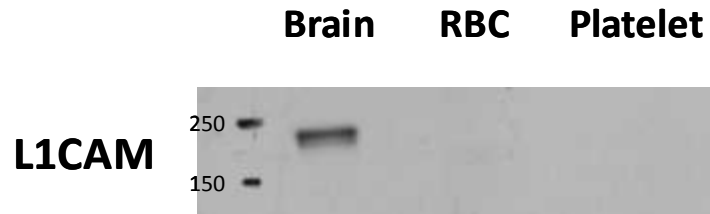

**Suppl. Fig. 2 Western blotting of L1CAM in red blood cells and platelets.** Whole blood from healthy old controls were collected and separated into red blood cells (RBCs), platelets, white blood cells, and platelet-free plasma as previously described (Shi et al, *Neurosci Lett* 2010, 480: 78-82). Cell lysates (100  $\mu$ g proteins) from RBCs and platelets were used, along with human cerebral cortex (Brain; 100  $\mu$ g proteins) homogenates as a control; membranes were probed with an anti-L1CAM antibody.
